# Supplementary material for: Large-Scale Analysis Exploring Evolution of Catalytic Machineries and Mechanisms in Enzyme Superfamilies
Source: PubMed Central journal article supplement (PMC4751976; doi:10.1016/j.jmb.2015.11.010), 2016-01-29
Supplement: mmc4.pdf [file mmc4.pdf]

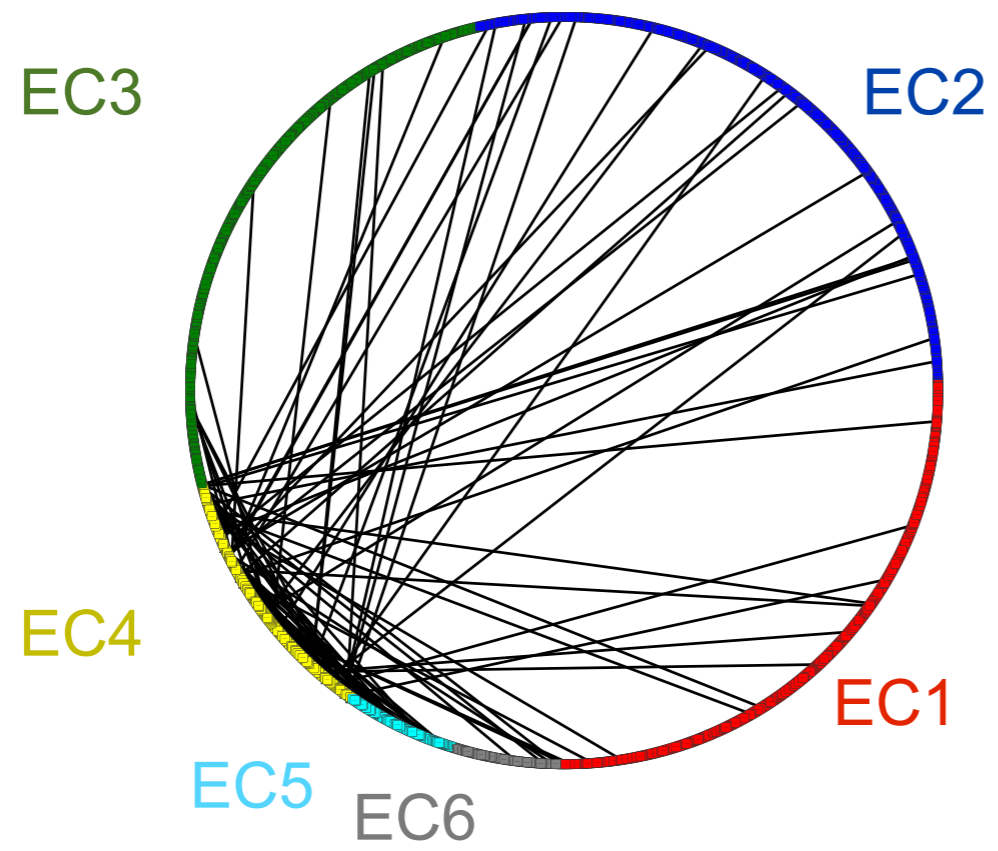

|      |     |     |     |    |     |            |
|------|-----|-----|-----|----|-----|------------|
| 1014 | 37  | 23  | 27  | 16 | 15  | 1          |
| 44   | 934 | 91  | 78  | 33 | 16  | 2          |
| 21   | 79  | 928 | 36  | 19 | 5   | 3          |
| 16   | 38  | 17  | 191 | 32 | 5   | 4          |
| 10   | 19  | 10  | 33  | 52 | 0   | 5          |
| 13   | 14  | 7   | 7   | 1  | 213 | 6          |
| 1    | 2   | 3   | 4   | 5  | 6   | E.C. class |

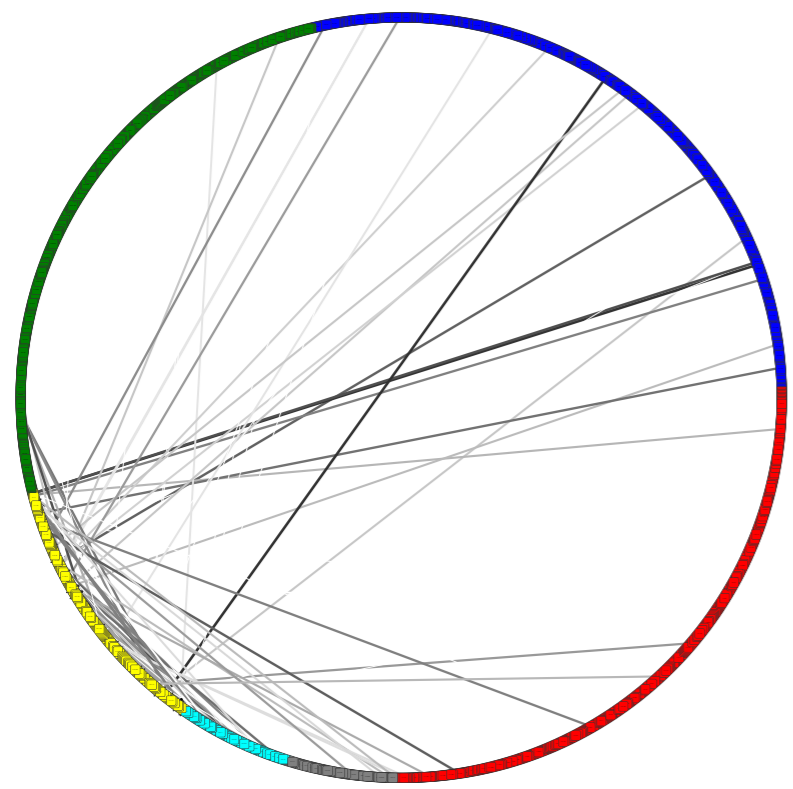

Bond Similarity

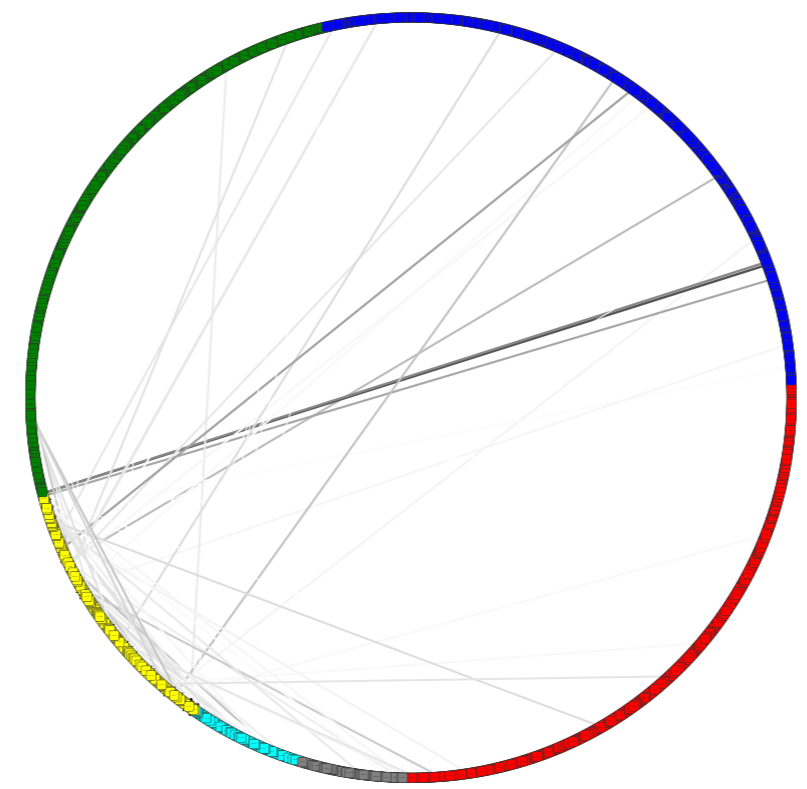

Reaction Centre Similarity

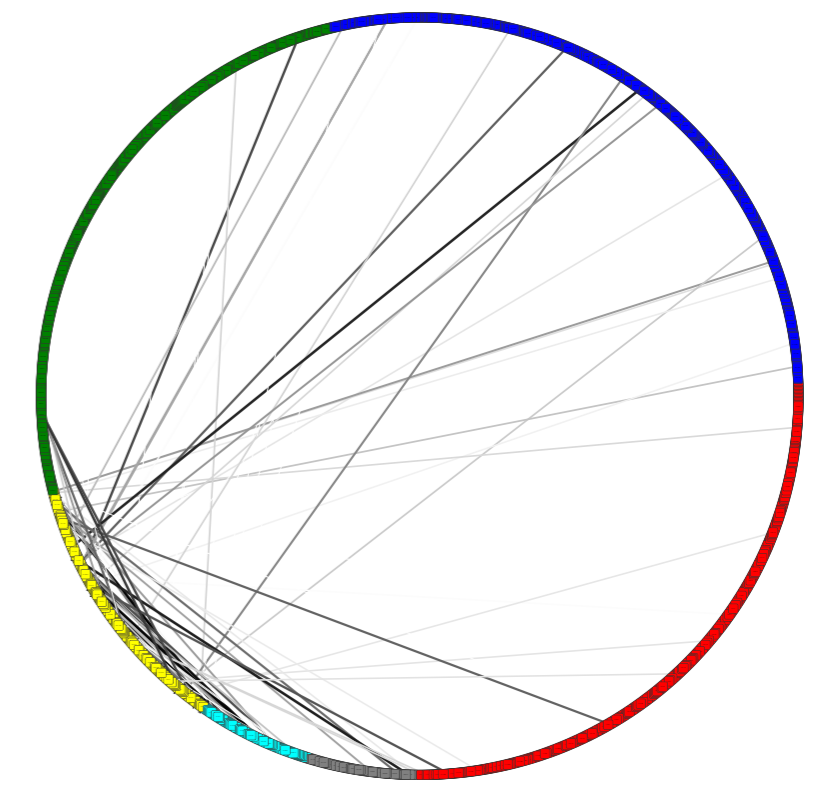

Sub-Structure Similarity
