# Supplementary material for: Large-Scale Analysis Exploring Evolution of Catalytic Machineries and Mechanisms in Enzyme Superfamilies
Source: PubMed Central journal article supplement (PMC4751976; doi:10.1016/j.jmb.2015.11.010), 2016-01-29

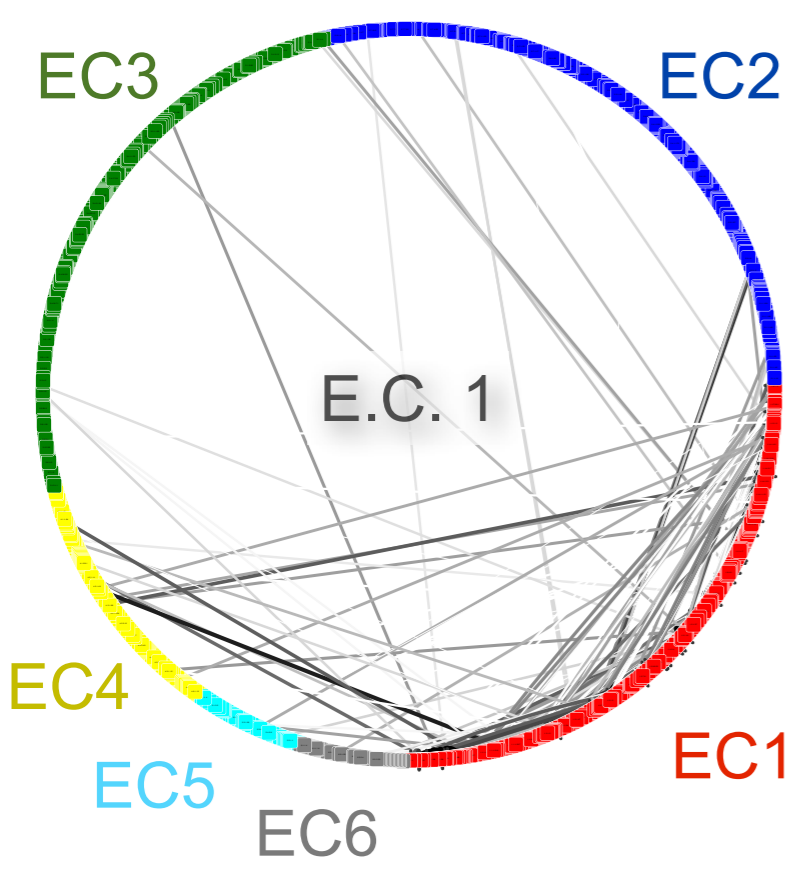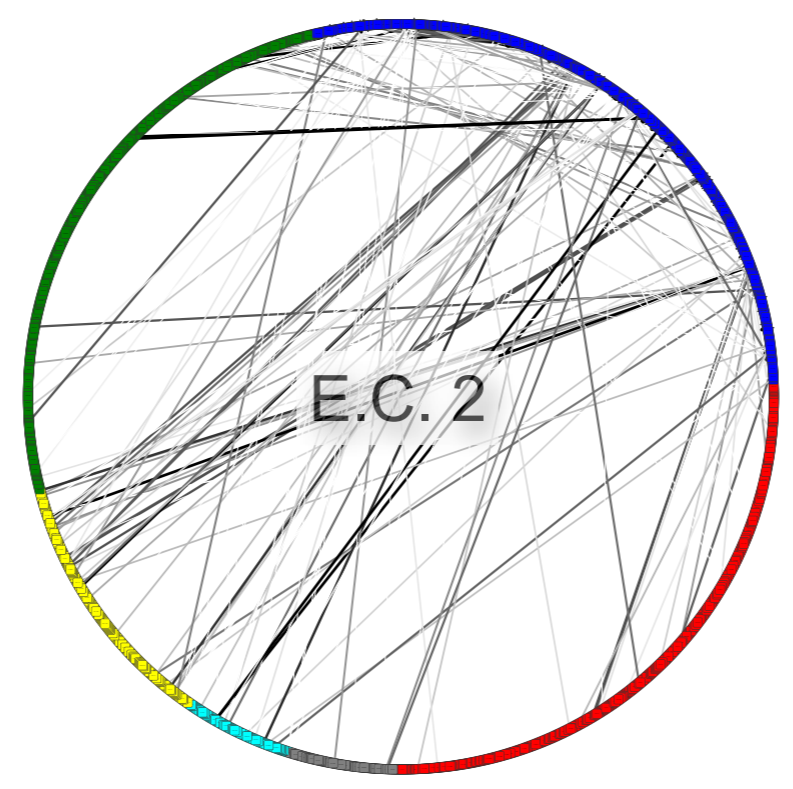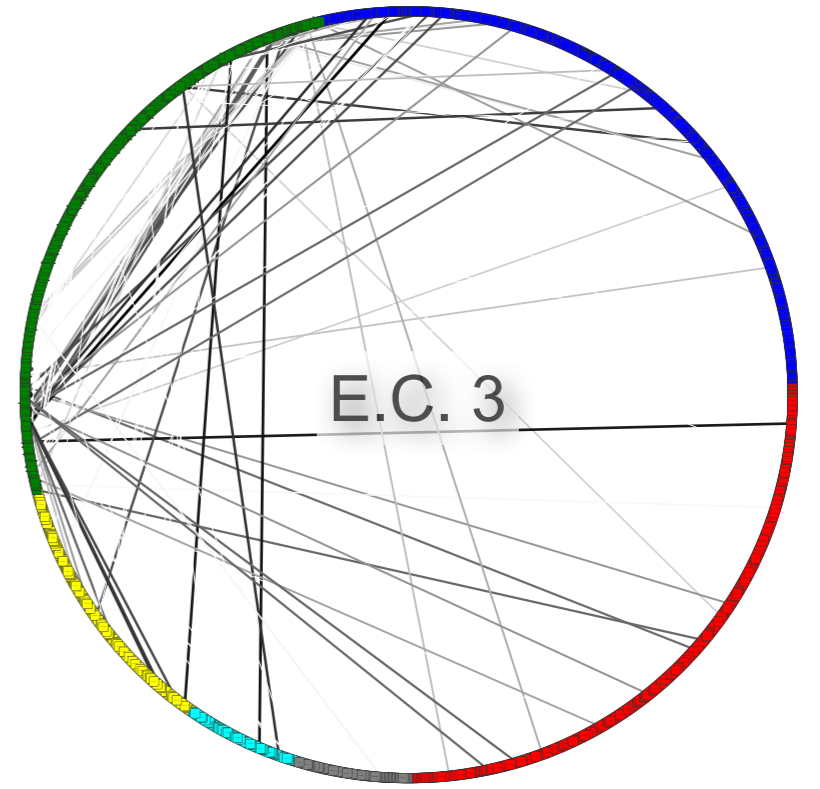

Sub-Structure Similarity

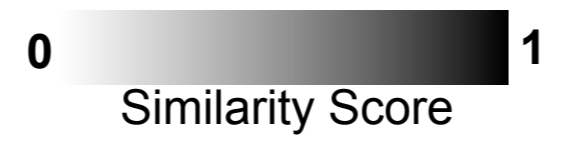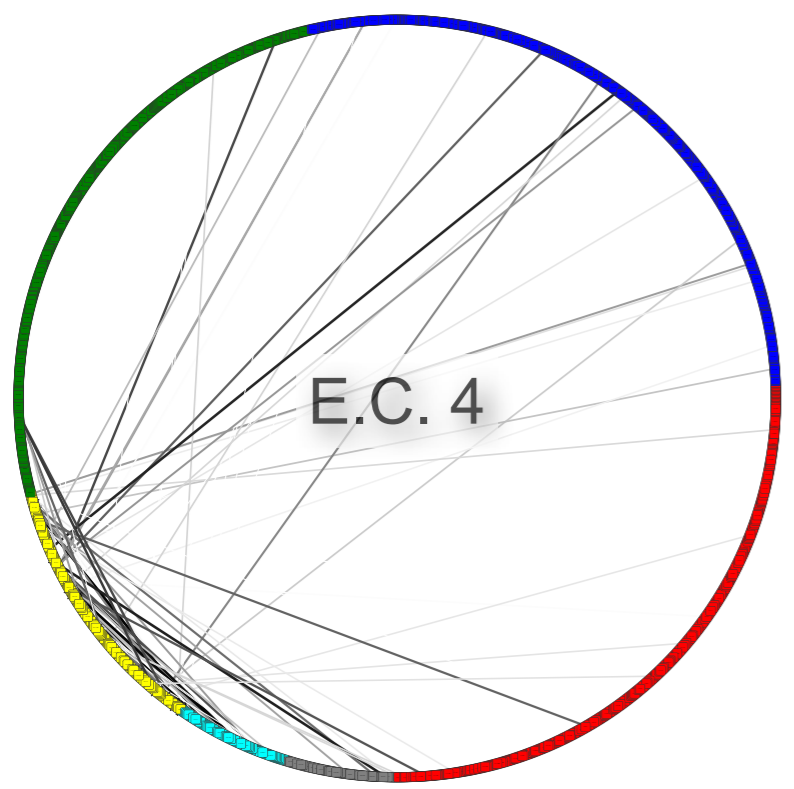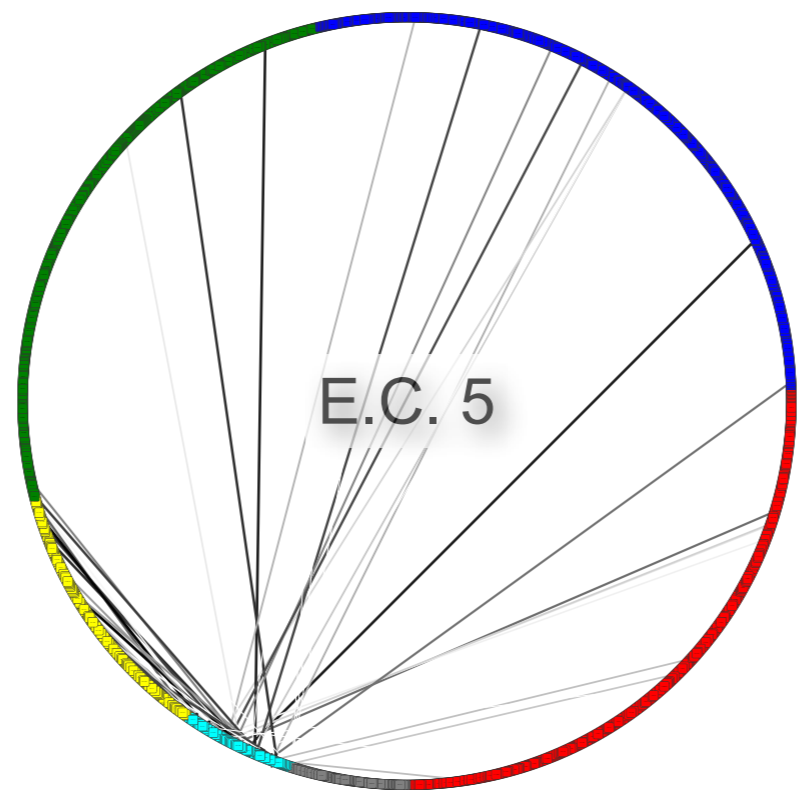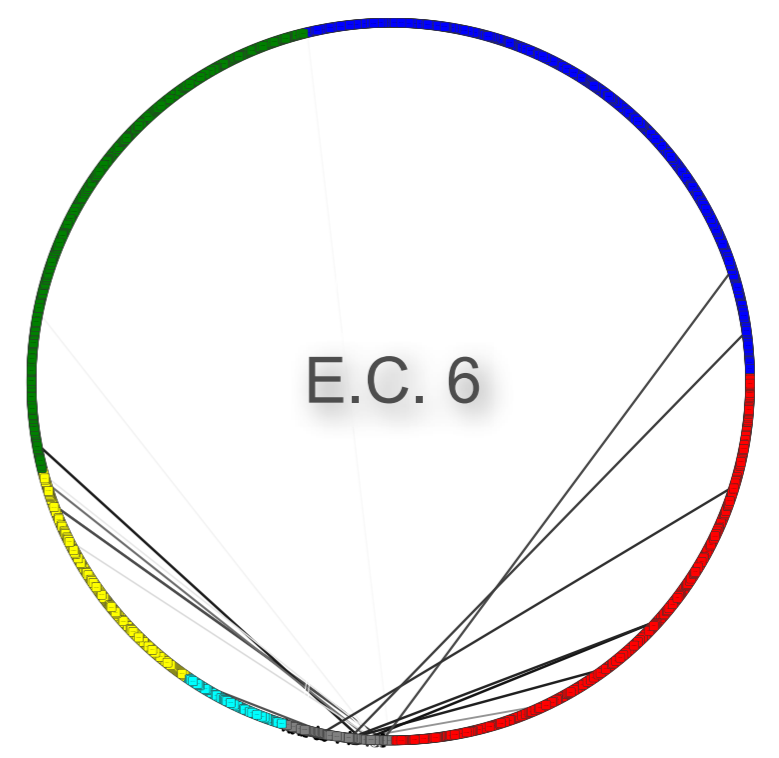

Supplement: mmc7.pdf [file mmc7.pdf]
