# Supplementary material for: Large-Scale Analysis Exploring Evolution of Catalytic Machineries and Mechanisms in Enzyme Superfamilies
Source: PubMed Central journal article supplement (PMC4751976; doi:10.1016/j.jmb.2015.11.010), 2016-01-29
Supplement: mmc11.pdf [file mmc11.pdf]

**A**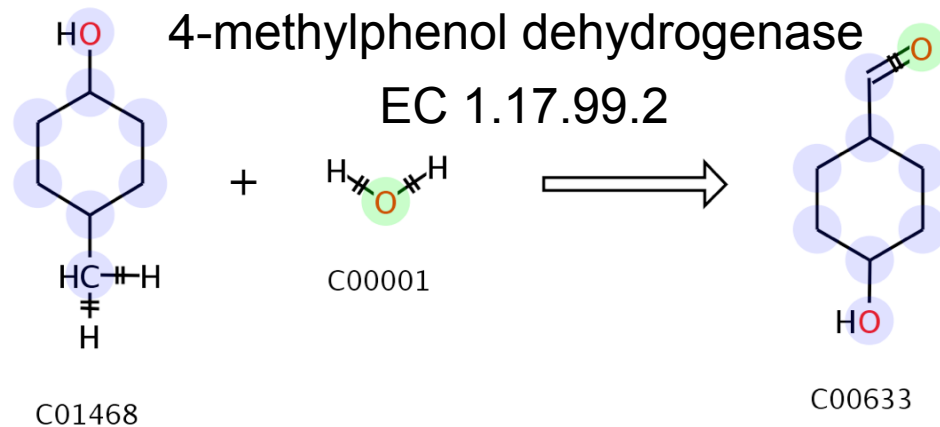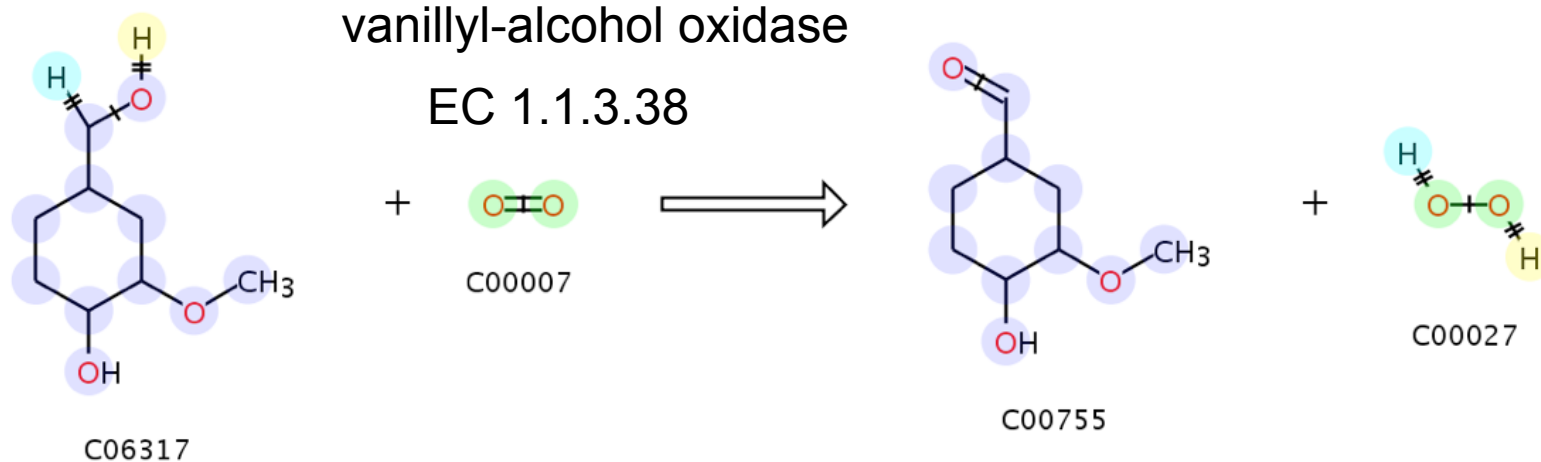**B****Bond Changes**

EC 1.17.99.2

| Formed/Cleaved (++) | Bond Order Changed (≠) | Stereo Changes (<math>\triangleleft</math>) |
|---------------------|------------------------|---------------------------------------------|
| C-O                 | 1                      | C(R/S)                                      |

EC 1.1.3.38

| Formed/Cleaved (++) | Bond Order Changed (≠) | Stereo Changes (<math>\triangleleft</math>) |
|---------------------|------------------------|---------------------------------------------|
| H-O                 | 3                      | O-O<math>\triangleleft</math>O=O            |
| C-H                 | 1                      | C-O<math>\triangleleft</math>C=O            |

EC-Blast Comparison of Bond Changes = 0; Similarity of reactants = 0.6
