# Supplementary material for: Large-Scale Analysis Exploring Evolution of Catalytic Machineries and Mechanisms in Enzyme Superfamilies
Source: PubMed Central journal article supplement (PMC4751976; doi:10.1016/j.jmb.2015.11.010), 2016-01-29

Structural superimposition & sequence alignments from agglomerative clustering

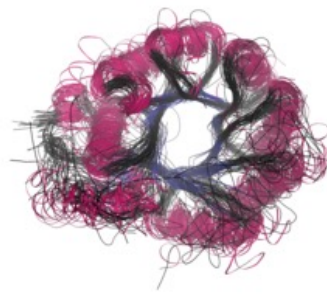

+

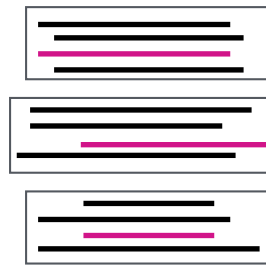

FunFam 1

FunFam 2

FunFam 3

Structurally informed multiple sequence alignment

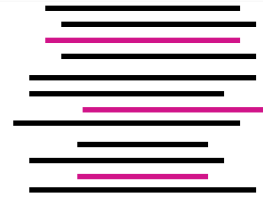

Filtered alignment maintaining UniProt reviewed entries with function annotation

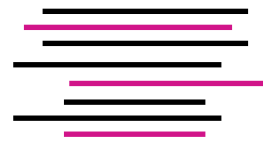

Generate phylogenetic tree using TreeBest, combining ML and taxonomic lineage tree

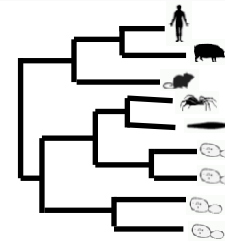

Add functional information i.e. E.C. numbers

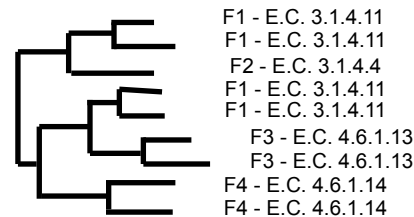

Calculate ancestral character estimations for each node in the tree. Using max likelihood at each node, count changes from root to branch.

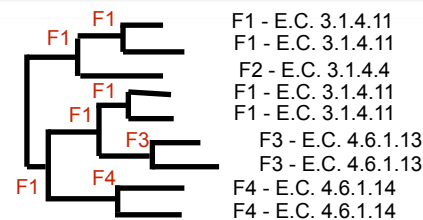

Supplement: mmc13.pdf [file mmc13.pdf]
